# Supplementary material
Source: Springer Nature journal article supplement (https://www.springermedizin.de/resource/supplementary/12881_2010_631_MOESM4_ESM.pdf/9451104)

(i)

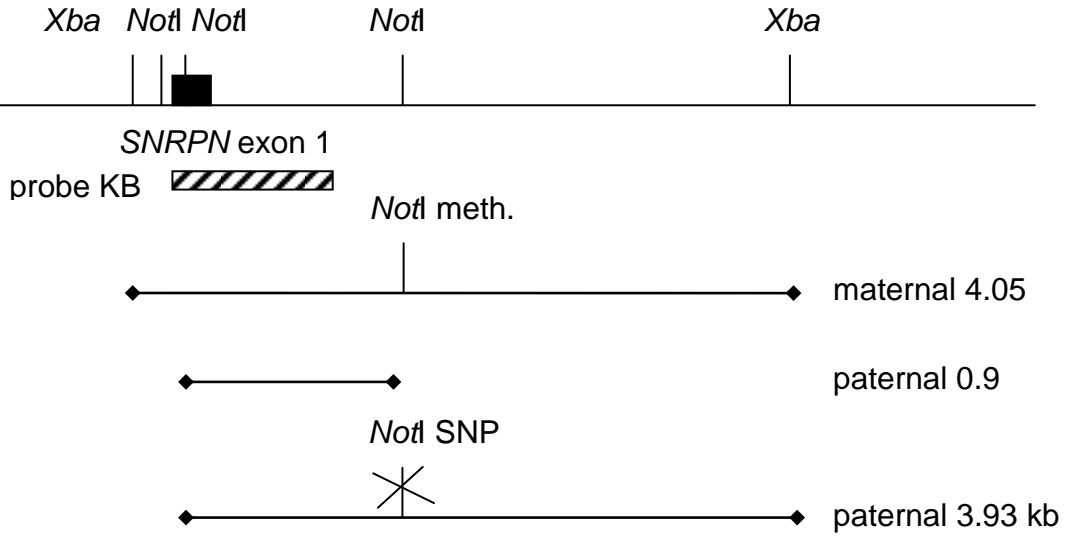

(ii)

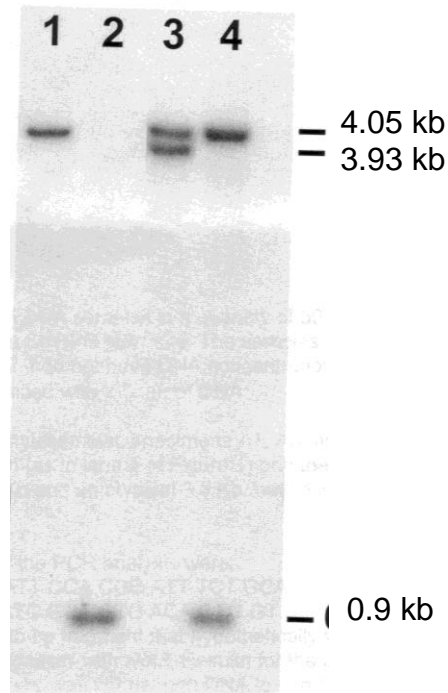

Supplement: MOESM4 [file 9451104]
